# Supplementary material for: Leishmania donovani 90 kD Heat Shock Protein – Impact of Phosphosites on Parasite Fitness, Infectivity and Casein Kinase Affinity
Source: PubMed Central journal article supplement (PMC6434042; doi:10.1038/s41598-019-41640-0), 2019-03-25
Supplement: 41598_2019_41640_MOESM1_ESM.pdf [file 41598_2019_41640_MOESM1_ESM.pdf]

# ***Leishmania donovani* 90 kD Heat Shock Protein – Impact of Phosphosites on Parasite Fitness, Infectivity and Casein Kinase Affinity**

## **Supplementary Information**

Antje Hombach-Barrigah<sup>1</sup>, Katharina Bartsch<sup>1</sup>, Despina Smirlis<sup>2,4</sup>, Heidi Rosenqvist<sup>3,6</sup>, Andrea MacDonald<sup>1</sup>, Florent Dingli<sup>5</sup>, Damarys Loew<sup>5</sup>, Gerald F. Späth<sup>2</sup>, Najma Rachidi<sup>2</sup>, Martin Wiese<sup>3</sup>, and Joachim Clos<sup>1\*</sup>

<sup>1</sup>Bernhard Nocht Institute for Tropical Medicine, Hamburg, Germany

<sup>2</sup>Institut Pasteur and Institut National de Santé et Recherche Médicale INSERM U1201, Unité de Parasitologie Moléculaire et Signalisation, Paris, France

<sup>3</sup>Strathclyde Institute of Pharmacy and Biomedical Sciences (SIPBS) University of Strathclyde, Glasgow, Scotland, UK

<sup>4</sup>Hellenic Pasteur Institute, Athens, Greece

<sup>5</sup>Laboratoire de Spectrométrie de Masse Protéomique, Centre de Recherche, Institut Curie, PSL Research University, Paris, France

<sup>6</sup>current address: Novo Nordisk A/S, Gentofte, Denmark

\*) corresponding author:

Joachim Clos, Bernhard Nocht Institute for Tropical Medicine, Hamburg, Germany

phone: +49 40 42818 481

e-mail: [clos@bnitm.de](mailto:clos@bnitm.de)

Key words: *Leishmania*, HSP90, casein kinase, protein phosphorylation, signal transduction, infectivity

**Table S1.** Primer sequences for the mutations of various HSP90 phosphorylation sites are listed in this table. The modified base triplets are highlighted in the sequence.

| Mutation                                                               | Sequence                                             |
|------------------------------------------------------------------------|------------------------------------------------------|
| T <sub>21</sub> -I <sub>21</sub>                                       | AACATCTTCTACTCGAACAAGGAG                             |
| T <sub>21</sub> -D <sub>21</sub>                                       | AACGACTTCTACTCGAACAAGGAG                             |
| T <sub>21</sub> rev                                                    | GATGATCAGCGACATCAAC                                  |
| T <sub>100</sub> -I <sub>100</sub>                                     | GGCATCAAGGCGTTCATGGAGGCG                             |
| T <sub>100</sub> -D <sub>100</sub>                                     | GGCGACAAGGCGTTCATGGAGGCG                             |
| T <sub>100</sub> rev                                                   | GGAGCGCGGATCGTGCC                                    |
| T <sub>211</sub> -A <sub>211</sub>                                     | ACGG <b>CGG</b> GAGAAGGAGGTGACGGACGAGGACGAG          |
| T <sub>211</sub> -D <sub>211</sub>                                     | ACGG <b>ACG</b> GAGAAGGAGGTGACGGACGAGGACGAG          |
| T <sub>216</sub> -A <sub>216</sub>                                     | ACGACGGAGAAGGAGGTGG <b>CGG</b> ACGAGGACGAG           |
| T <sub>216</sub> -D <sub>216</sub>                                     | ACGACGGAGAAGGAGGTGG <b>ACG</b> ACGAGGACGAG           |
| T <sub>211</sub> /T <sub>216</sub> -A <sub>211</sub> /A <sub>216</sub> | ACGG <b>CGG</b> GAGAAGGAGGTGG <b>CGG</b> ACGAGGACGAG |
| T <sub>211</sub> /T <sub>216</sub> rev                                 | CTTCTCCACCATCAGCTCG                                  |
| T <sub>223</sub> -A <sub>223</sub>                                     | GAGGAT <b>GCG</b> AAGAAGGCCCGCCGAGGAC                |
| T <sub>223</sub> -D <sub>223</sub>                                     | GAGGAT <b>GACA</b> AAGAAGGCCCGCCGAGGAC               |
| T <sub>223</sub> rev                                                   | CTCGTCCTCGTCCGTCACCTC                                |
| S <sub>289</sub> -A <sub>289</sub>                                     | CATCGCCAACGACTGGGAGGAC                               |
| S <sub>289</sub> rev                                                   | GCCTTGTAGAAGGCCGCG                                   |
| S <sub>526</sub> -A <sub>526</sub>                                     | TTCGAGGAG <b>GCGG</b> AGGAGGAGAAGCAGCAG              |
| S <sub>526</sub> rev                                                   | GTGCACGCCCTCCTTCGTCAG                                |
| S <sub>594</sub> -A <sub>594</sub>                                     | GCGAC <b>GCC</b> AGCATGGCGCAGTACATGATG               |
| S <sub>595</sub> -A <sub>595</sub>                                     | GCGACTCC <b>GCC</b> ATGGCGCAGTACATGATG               |
| S <sub>594</sub> /S <sub>595</sub> -A <sub>594</sub> /A <sub>595</sub> | GCGAC <b>GCCG</b> CCATGGCGCAGTACATGATG               |
| S <sub>594</sub> /S <sub>595</sub> -D <sub>594</sub> /D <sub>595</sub> | GCGAC <b>GGACG</b> ACATGGCGCAGTACATGATG              |
| S <sub>594</sub> /S <sub>595</sub> rev                                 | GCAGCGCCTGGTTGCGCATG                                 |
| T <sub>693</sub> -A <sub>693</sub>                                     | CGG <b>CGC</b> CTCCAGCATGGAGCAGGTGGAC                |
| T <sub>693</sub> -D <sub>693</sub>                                     | CGG <b>CGACT</b> CCAGCATGGAGCAGGTGGAC                |
| S <sub>694</sub> -A <sub>694</sub>                                     | CGGCAC <b>CGC</b> AGCATGGAGCAGGTGGAC                 |
| S <sub>694</sub> -D <sub>694</sub>                                     | CGGCAC <b>CGAC</b> AGCATGGAGCAGGTGGAC                |
| T <sub>693</sub> /S <sub>694</sub> rev                                 | GCGGTGACCTCCGCGGGGGCCG                               |

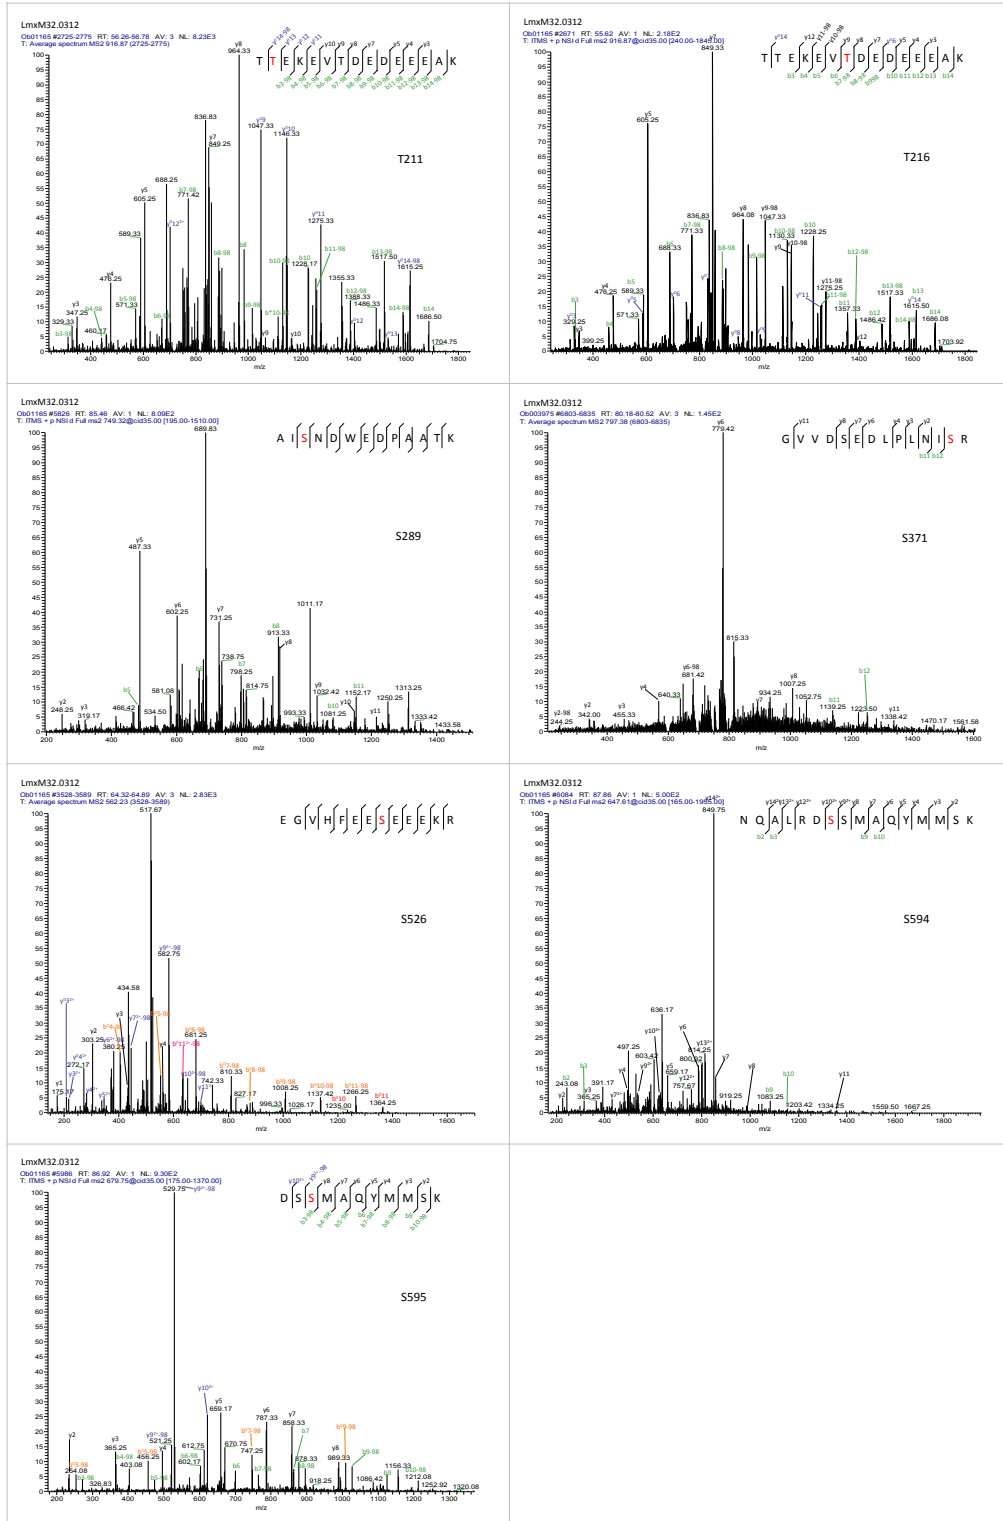

**Figure S1:** Mass spectra identifying phosphorylated peptides derived from the *Leishmania mexicana* HSP90

|                                    | - RAD                                                                               | + RAD                                                                                |
|------------------------------------|-------------------------------------------------------------------------------------|--------------------------------------------------------------------------------------|
| HSP90rr                            | 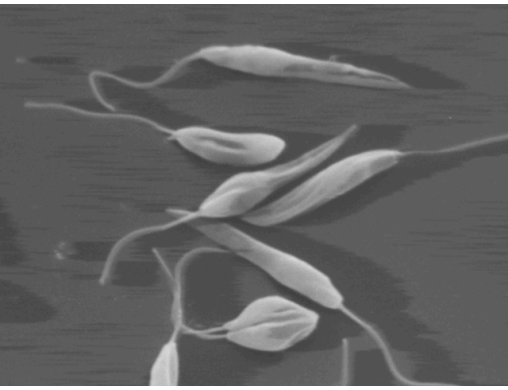   |    |
| HSP90wt                            |   |   |
|                                    |                                                                                     |                                                                                      |
| <b>P-site</b>                      | Ala +RAD                                                                            | Asp +RAD                                                                             |
| T <sub>211</sub> /T <sub>216</sub> |  | n.a.                                                                                 |
| T <sub>223</sub>                   |  |  |

|                    |                                                                                   |                    |
|--------------------|-----------------------------------------------------------------------------------|--------------------|
| <p><b>S289</b></p> | 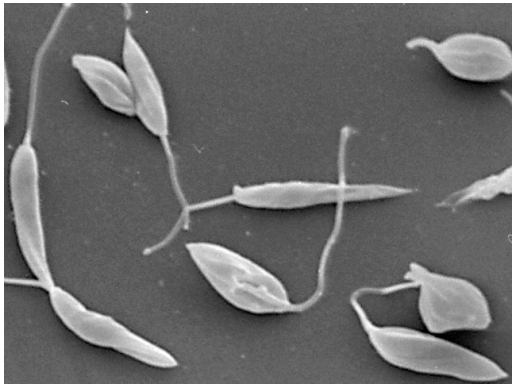 | <p><b>n.a.</b></p> |
| <p><b>S526</b></p> |  | <p><b>n.a.</b></p> |

**Figure S2A:** Representative images from the morphological analysis summarised in Fig. 3A. Scanning electron micrographs of *L. donovani*, ectopically expressing HSP90rr, HSP90wt, and P-site mutations of HSP90rr (serine or threonine to alanine or aspartic acid) and exposed to RAD at IC<sub>50</sub>.

|                  | - RAD                                                                               | + RAD                                                                                |
|------------------|-------------------------------------------------------------------------------------|--------------------------------------------------------------------------------------|
| HSP90rr          | 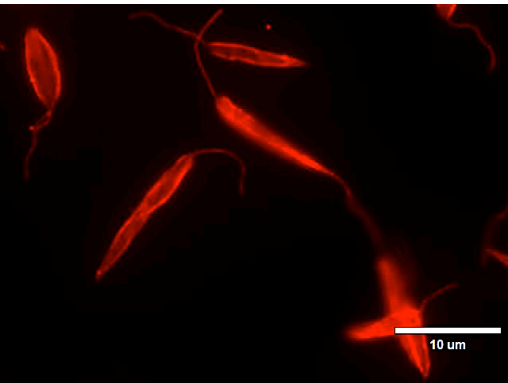   |    |
| HSP90wt          |   |   |
| P-site           | Ala +RAD                                                                            | Asp +RAD                                                                             |
| S <sub>594</sub> |  |  |
| S <sub>595</sub> |  |  |

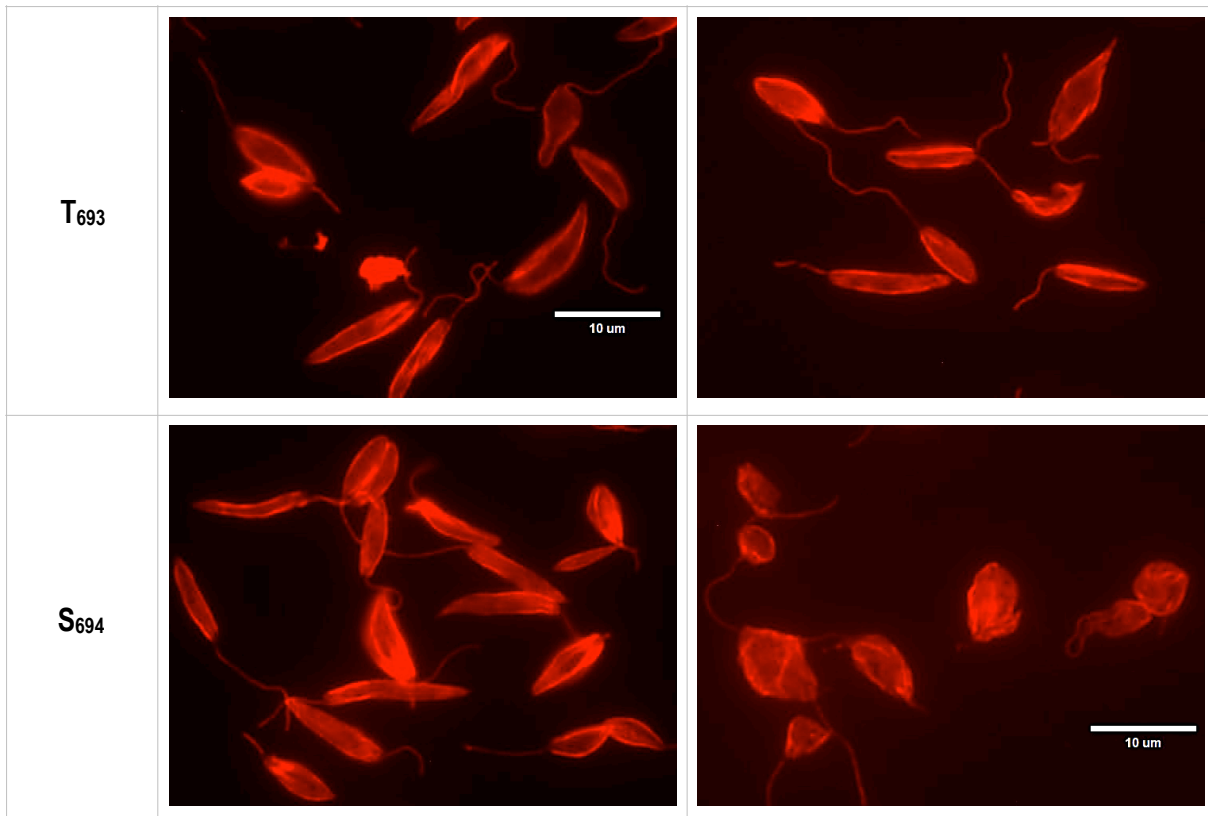

**Figure S2B:** Representative images from the morphological analysis summarised in Fig. 3B. Anti-tubulin indirect immune micrographs of *L. donovani*, ectopically expressing HSP90rr, HSP90wt, and P-site mutations of HSP90rr (serine or threonine to alanine or aspartic acid) and exposed to RAD at IC<sub>50</sub>. One image (HSP90wt + RAD) shows DAPI co-staining.
